# Supplementary material for: The spread of a validated molecular marker of artemisinin partial resistance pfkelch13 R622I and association with pfhrp2/3 deletions in Eritrea
Source: bioRxiv or medRxiv preprint supplement (doi:10.1101/2023.10.20.23297302), 2023-10-21
Supplement: Supplementary file [file media-1.pdf]

1 SUPPLEMENTARY MATERIAL

2 **The spread of a validated molecular marker of artemisinin partial resistance *pfkelch13***

3 **R622I and association with *pfhrp2/3* deletions in Eritrea**

4 Selam Mihreteab<sup>1</sup>, Karen Anderson<sup>2,3</sup>, Irene Molina - de la Fuente<sup>4,5</sup>, Colin J. Sutherland<sup>6</sup>,  
5 David Smith<sup>2,3</sup>, Jane Cunningham<sup>7</sup>, Khalid B Beshir<sup>6\*</sup>, Qin Cheng<sup>2,3\*</sup>

6  
7 <sup>1</sup>National Malaria Control Program, Ministry of Health, Asmara, Eritrea; <sup>2</sup>Drug Resistance  
8 and Diagnostics, Australian Defence Force Malaria and Infectious Disease Institute, Brisbane,  
9 Australia; <sup>3</sup>QIMR-Berghofer Medical Research Institute, Brisbane, Australia; <sup>4</sup> Carlos III  
10 Institute of Health, Madrid, Spain; <sup>5</sup>University of Alcalá, Madrid, Spain; <sup>6</sup>Faculty of Infectious  
11 Diseases, London School of Hygiene & Tropical Medicine, UK; <sup>7</sup>Global Malaria Programme,  
12 World Health Organization, Geneva, Switzerland.

13 \*Corresponding authors

14 Dr Qin Cheng, Australian Defence Force Malaria and Infectious Disease Institute, Weary  
15 Dunlop Drive, Gallipoli Barracks, Enoggera, QLD 4051, Australia. email:

16 [qin.cheng@defence.gov.au](mailto:qin.cheng@defence.gov.au).

17 Dr Khalid B Beshir, Faculty of Infectious Diseases, London School of Hygiene & Tropical  
18 Medicine, UK. Email: [Khalid.Beshir@lshtm.ac.uk](mailto:Khalid.Beshir@lshtm.ac.uk).

19

20

**Supplemental Table 1.** Number of samples sequenced for *pfk13*, mutations identified and mutation frequency in different health facilities.

| Zone         | Health Centre   | No. sequenced | E605K    |             | R622I     |              | N657K    |             | K658E    |             | S679L    |             | WT         |              |
|--------------|-----------------|---------------|----------|-------------|-----------|--------------|----------|-------------|----------|-------------|----------|-------------|------------|--------------|
|              |                 |               | n        | %           | n         | %            | n        | %           | n        | %           | n        | %           | n          | %            |
| Gash Barka   | Agordat         | 95            | 0        | 0.0%        | 13        | 13.7%        | 1        | 1.1%        | 0        | 0.0%        | 0        | 0.0%        | 81         | 85.3%        |
|              | Shambuko        | 61            | 1        | 1.6%        | 7         | 11.5%        | 0        | 0.0%        | 1        | 1.6%        | 0        | 0.0%        | 52         | 85.2%        |
|              | Tesseney        | 61            | 0        | 0.0%        | 7         | 11.5%        | 0        | 0.0%        | 0        | 0.0%        | 0        | 0.0%        | 54         | 88.5%        |
|              | Tokombia        | 62            | 0        | 0.0%        | 7         | 11.3%        | 0        | 0.0%        | 0        | 0.0%        | 0        | 0.0%        | 55         | 88.7%        |
|              | Barentu         | 91            | 0        | 0.0%        | 10        | 11.0%        | 1        | 1.1%        | 0        | 0.0%        | 0        | 0.0%        | 80         | 87.9%        |
|              | <i>Subtotal</i> | <i>370</i>    | <i>1</i> | <i>0.3%</i> | <i>44</i> | <i>11.9%</i> | <i>2</i> | <i>0.5%</i> | <i>1</i> | <i>0.3%</i> | <i>0</i> | <i>0.0%</i> | <i>322</i> | <i>87.0%</i> |
| Anseba       | Keren           | 91            | 0        | 0.0%        | 9         | 9.9%         | 0        | 0.0%        | 0        | 0.0%        | 0        | 0.0%        | 82         | 90.1%        |
|              | Hagaz           | 25            | 0        | 0.0%        | 7         | 28.0%        | 0        | 0.0%        | 0        | 0.0%        | 0        | 0.0%        | 18         | 72.0%        |
|              | <i>Subtotal</i> | <i>116</i>    | <i>0</i> | <i>0.0%</i> | <i>16</i> | <i>13.8%</i> | <i>0</i> | <i>0.0%</i> | <i>0</i> | <i>0.0%</i> | <i>0</i> | <i>0.0%</i> | <i>100</i> | <i>86.2%</i> |
| Debub        | Mendefera       | 51            | 0        | 0.0%        | 3         | 5.9%         | 0        | 0.0%        | 0        | 0.0%        | 0        | 0.0%        | 48         | 94.1%        |
|              | Maymine         | 40            | 0        | 0.0%        | 5         | 12.5%        | 0        | 0.0%        | 0        | 0.0%        | 1        | 2.5%        | 34         | 85.0%        |
|              | A/D/E/M         | 10            | 0        | 0.0%        | 2         | 20.0%        | 0        | 0.0%        | 0        | 0.0%        | 0        | 0.0%        | 8          | 80.0%        |
|              | <i>Subtotal</i> | <i>101</i>    | <i>0</i> | <i>0.0%</i> | <i>10</i> | <i>9.9%</i>  | <i>0</i> | <i>0.0%</i> | <i>0</i> | <i>0.0%</i> | <i>1</i> | <i>1.0%</i> | <i>90</i>  | <i>89.1%</i> |
| <b>Total</b> |                 | <b>587</b>    | <b>1</b> | <b>0.2%</b> | <b>70</b> | <b>11.9%</b> | <b>2</b> | <b>0.3%</b> | <b>1</b> | <b>0.2%</b> | <b>1</b> | <b>0.2%</b> | <b>512</b> | <b>87.2%</b> |

**Supplemental Table 2.** Haplotypes observed among 26 samples carrying *pfk13* R622I mutation.

| Zone       | Location  | SAMPLE ID | TA1 | 313 | 2490 | 383 | POLY A | PK2 | TA109 | Haplo type |
|------------|-----------|-----------|-----|-----|------|-----|--------|-----|-------|------------|
| Gash Barka | Agordat   | EA04      | 165 | 229 | 83   | 137 | 152    | 162 | 160   | 1          |
|            | Agordat   | EA02      | 165 | 233 | 83   | 137 | 152    | 162 | 160   | 2          |
|            | Agordat   | EA28      | 165 | 233 | 83   | 137 | 152    | 162 | 160   | 2          |
|            | Agordat   | EA66      | 165 | 233 | 83   | 137 | 158    | 162 | 151   | 3          |
|            | Barentu   | EB1988    | 159 | 253 | 83   | 125 | 152    | 162 | 172   | 4          |
|            | Barentu   | EB2254    | 165 | 219 | 83   | 125 | 158    | 162 | 160   | 5          |
|            | Barentu   | EB1793    | 165 | 219 | 83   | 127 | 158    | 171 | 160   | 6          |
|            | Barentu   | EB1986    | 165 | 237 | 83   | 127 | 167    | 171 | 175   | 7          |
|            | Shambuko  | ES65      | 165 | 233 | 83   | 137 | 152    | 162 | 151   | 8          |
|            | Shambuko  | ES26      | 165 | 233 | 83   | 137 | 152    | 171 | 151   | 9          |
|            | Shambuko  | ES61      | 165 | 235 | 83   | 137 | 158    | 162 | 175   | 10         |
|            | Tesseney  | ETHOS03   | 165 | 229 | 83   | 137 | 158    | 162 | 151   | 11         |
|            | Tesseney  | ETHOS30   | 165 | 247 | 83   | 136 | 152    | 162 | 154   | 12         |
|            | Tokombia  | ETHC59    | 159 | 229 | 83   | 137 | 152    | 162 | 151   | 12         |
|            | Tokombia  | ETHC60    | 165 | 233 | 83   | 137 | 173    | 162 | 175   | 14         |
| Tokombia   | ETHC42    | 165       | 235 | 83  | 137  | 158 | 162    | 165 | 15    |            |
| Anseba     | Hagaz     | EH07      | 165 | 229 | 83   | 137 | 149    | 162 | 160   | 16         |
|            | Hagaz     | EH23      | 165 | 233 | 83   | 127 | 167    | 171 | 160   | 17         |
|            | Hagaz     | EH04      | 165 | 233 | 83   | 137 | 170    | 162 | 163   | 18         |
|            | Hagaz     | EH20      | 165 | 233 | 83   | 137 | 173    | 162 | 175   | 14         |
|            | Hagaz     | EH29      | 165 | 233 | 83   | 137 | 173    | 162 | 175   | 14         |
|            | Hagaz     | EH17      | 165 | 249 | 83   | 137 | 152    | 162 | 163   | 19         |
|            | Keren     | EK67      | 165 | 233 | 83   | 137 | 152    | 162 | 163   | 20         |
| Debut      | Maimine   | EMA02     | 159 | 233 | 83   | 127 | 176    | 186 | 172   | 21         |
|            | Maimine   | EMA33     | 165 | 229 | 83   | 137 | 155    | 186 | 175   | 22         |
|            | Mendefera | EME31     | 165 | 229 | 83   | 137 | 158    | 162 | 160   | 23         |

**Supplemental Table 3.** Number of unique alleles and genetic diversity detected per microsatellite locus and population.

| Microsatellite marker | Number of alleles |           | Gene diversity $H_E$ per locus |                          |
|-----------------------|-------------------|-----------|--------------------------------|--------------------------|
|                       | Mutant            | Wild type | Mutant                         | Wild type                |
| TA1                   | 2                 | 8         | 0.212                          | 0.647                    |
| 313                   | 8                 | 8         | 0.745                          | 0.542                    |
| 2490                  | 1                 | 5         | 0.000                          | 0.167                    |
| 383                   | 3                 | 9         | 0.394                          | 0.455                    |
| PolyA                 | 8                 | 13        | 0.785                          | 0.828                    |
| PK2                   | 3                 | 9         | 0.394                          | 0.674                    |
| TA109                 | 7                 | 10        | 0.812                          | 0.728                    |
| Total                 | 23                | 87        | Mean (95% CI)                  | Mean (95% CI)            |
|                       |                   |           | 0.4774 (0.1873 - 0.7676)       | 0.5773 (0.3760 - 0.7786) |
| P = 0.0500            |                   |           |                                |                          |

**Supplemental Table 4.** Number and proportion of samples with different *pfhrp2/3* status.

| Zone         | Health Centre   | No. Tested | Single <i>pfhrp2</i> del |             | Single <i>pfhrp3</i> del |              | Dual <i>pfhrp2/3</i> del |              | No del     |              |
|--------------|-----------------|------------|--------------------------|-------------|--------------------------|--------------|--------------------------|--------------|------------|--------------|
|              |                 |            | n                        | %           | n                        | %            | n                        | %            | n          | %            |
| Gash Barka   | Agordat         | 93         | 4                        | 4.3%        | 43                       | 46.2%        | 28                       | 30.1%        | 18         | 19.4%        |
|              | Shambuko        | 59         | 1                        | 1.7%        | 26                       | 44.1%        | 18                       | 30.5%        | 14         | 23.7%        |
|              | Tesseney        | 61         | 2                        | 3.3%        | 25                       | 41.0%        | 10                       | 16.4%        | 24         | 39.3%        |
|              | Tokombia        | 62         | 1                        | 1.6%        | 24                       | 38.7%        | 11                       | 17.7%        | 26         | 41.9%        |
|              | Barentu         | 90         | 3                        | 3.3%        | 43                       | 47.8%        | 21                       | 23.3%        | 23         | 25.6%        |
|              | <i>Subtotal</i> | <i>365</i> | <i>11</i>                | <i>3.0%</i> | <i>161</i>               | <i>44.1%</i> | <i>88</i>                | <i>24.1%</i> | <i>105</i> | <i>28.8%</i> |
| Anseba       | Keren           | 89         | 5                        | 5.6%        | 42                       | 47.2%        | 26                       | 29.2%        | 16         | 18.0%        |
|              | Hagaz           | 25         | 0                        | 0.0%        | 11                       | 44.0%        | 6                        | 24.0%        | 8          | 32.0%        |
|              | <i>Subtotal</i> | <i>114</i> | <i>5</i>                 | <i>4.4%</i> | <i>53</i>                | <i>46.5%</i> | <i>32</i>                | <i>28.1%</i> | <i>24</i>  | <i>21.1%</i> |
| Debub        | Mendefera       | 51         | 0                        | 0.0%        | 17                       | 33.3%        | 19                       | 37.3%        | 15         | 29.4%        |
|              | Maimine         | 38         | 0                        | 0.0%        | 20                       | 52.6%        | 3                        | 7.9%         | 15         | 39.5%        |
|              | A/D/E/M         | 10         | 1                        | 10.0%       | 4                        | 40.0%        | 3                        | 30.0%        | 2          | 20.0%        |
|              | <i>Subtotal</i> | <i>99</i>  | <i>1</i>                 | <i>1.0%</i> | <i>41</i>                | <i>41.4%</i> | <i>25</i>                | <i>25.3%</i> | <i>32</i>  | <i>32.3%</i> |
| <b>Total</b> |                 | <b>578</b> | <b>17</b>                | <b>2.9%</b> | <b>255</b>               | <b>44.1%</b> | <b>145</b>               | <b>25.1%</b> | <b>161</b> | <b>27.9%</b> |

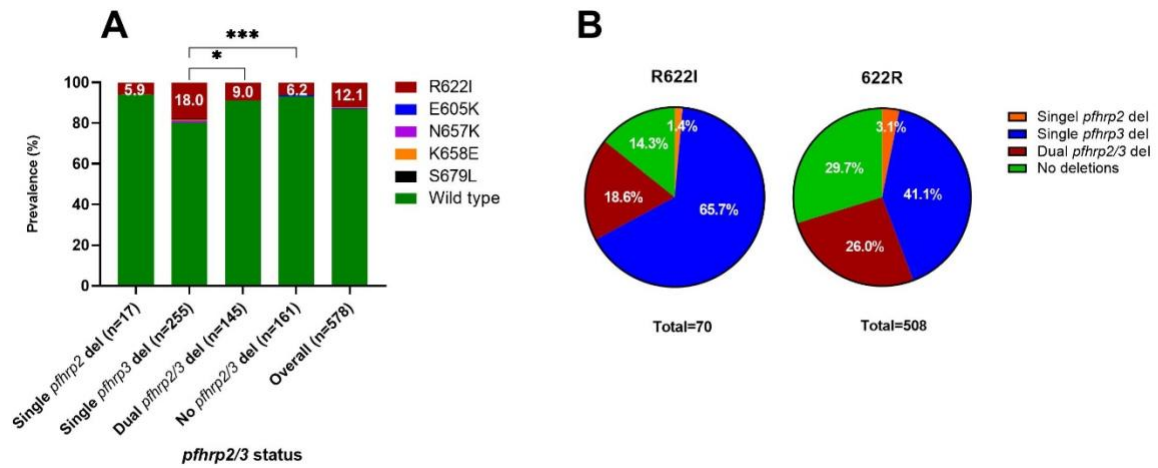

**Supplementary Figure 1.** Prevalence K13 mutations in samples with different *pfhrp2/3* status (A) and proportion of *pfhrp2/3*-deleted parasites among K13 R622I mutant and 622R wild type (B).
